# Supplementary material
Source: publisher figshare collection journal article supplement (https://sage.figshare.com/ndownloader/files/14005346)

## APPENDICES

Appendix Table 1) Predicting Three Different Measures of Successful Aging in 1986 and 1989

| VARIABLES                                     | 1986 Respondents Over 50 (n=1921) |         |               | 1989 Respondents Over 50 (n=1597) |         |               |
|-----------------------------------------------|-----------------------------------|---------|---------------|-----------------------------------|---------|---------------|
|                                               | Binary                            | Ordinal | Sq Continuous | Binary                            | Ordinal | Sq Continuous |
| <b><u>Demographics</u></b>                    |                                   |         |               |                                   |         |               |
| Female                                        | 0.48**                            | 0.73*   | -0.07         | 0.57*                             | 0.89    | -167.06++     |
| Age                                           | 0.95**                            | 0.95*** | -0.02***      | 0.96**                            | 0.96*** | -38.26***     |
| Black                                         | 0.69                              | 0.80+   | -0.04         | 0.86                              | 0.61**  | -149.37       |
| <b><u>Income (Ref: &lt;\$19,999)</u></b>      |                                   |         |               |                                   |         |               |
| 20,000-29,999                                 | 2.04*                             | 1.52*   | 0.17*         | 0.91                              | 1.47*   | 594.83***     |
| 30,000-39,999                                 | 2.39*                             | 2.17*** | 0.23*         | 1.07                              | 1.77*   | 374.39+       |
| 40,000-59,999                                 | 2.18*                             | 1.68*   | 0.28**        | 1.74++                            | 2.31*** | 693.86***     |
| 60,000+                                       | 4.28***                           | 3.02*** | 0.42**        | 1.76++                            | 2.34**  | 713.78***     |
| <b><u>Education (Ref: &lt;=11 yrs)</u></b>    |                                   |         |               |                                   |         |               |
| 12-15 years                                   | 2.42**                            | 1.75*** | 0.30***       | 2.73**                            | 2.06*** | 670.08***     |
| 16 years or more                              | 5.86***                           | 3.47*** | 0.67***       | 4.20***                           | 3.66*** | 1,204.18***   |
| <b><u>Health Behaviors</u></b>                |                                   |         |               |                                   |         |               |
| Physical Activity                             | 0.98                              | 1.24**  | 0.22***       | 1.15                              | 1.27*** | 381.16***     |
| <b><u>Smoking (Ref: Never smoked)</u></b>     |                                   |         |               |                                   |         |               |
| Former smoker                                 | 0.57+                             | 0.75*   | -0.06         | 0.76                              | 0.77+   | -203.95+      |
| Current smoker                                | 0.89                              | 0.75+   | -0.16*        | 1.37                              | 1.16    | -219.36++     |
| <b><u>Monthly Alcohol Use (Ref: None)</u></b> |                                   |         |               |                                   |         |               |
| 1-60                                          | 1.51++                            | 1.77*** | 0.17**        | 1.13                              | 1.41*   | 270.34*       |
| 61+                                           | 0.45++                            | 1.07    | -0.13++       | 2.04++                            | 1.63    | -61.44        |
| <b><u>BMI (Ref: Normal)</u></b>               |                                   |         |               |                                   |         |               |
| Overweight                                    | 1                                 | 1.06    | 0.05          | 1.1                               | 1.39*   | 157.14++      |
| Obese                                         | 0.65                              | 0.95    | -0.12+        | 0.75                              | 1.03    | -108          |
| <b><u>Psychosocial Risks</u></b>              |                                   |         |               |                                   |         |               |
| Chronic Stress                                | 0.86                              | 0.9     | -0.05++       | 1.03                              | 1.02    | 14.44         |
| Total Life Events                             | 0.94                              | 0.92+   | -0.08***      | 0.82**                            | 0.90**  | -153.66***    |
| Mastery                                       | 1.13                              | 1.11++  | 0.09**        | 1.37*                             | 1.32*** | 298.83***     |
| Support                                       | 1.15                              | 1.02    | 0.01          | 1.14                              | 1.05    | 131.66*       |
| R-squared                                     |                                   |         | 0.39          |                                   |         | 0.42          |

++p<.20; +p<.10; \*p<.05; \*\*p<.01; \*\*\*p<.001

All independent variables are measured in the same year as the outcome measure.

Appendix Table 2) Predicting Three Different Measures of Successful Aging in 1994 and 2001

| VARIABLES                                     | <u>1994 Respondents Over 50 (n=1287)</u> |              |               | <u>2001 Respondents Over 50 (n=1089)</u> |              |               |
|-----------------------------------------------|------------------------------------------|--------------|---------------|------------------------------------------|--------------|---------------|
|                                               | Binary (OR)                              | Ordinal (OR) | Sq Continuous | Binary (OR)                              | Ordinal (OR) | Sq Continuous |
| <b><u>Demographics</u></b>                    |                                          |              |               |                                          |              |               |
| Female                                        | 0.99                                     | 0.97         | 2.3           | 0.61+                                    | 0.80++       | -60.36        |
| Age                                           | 0.95**                                   | 0.95***      | -42.83***     | 0.94***                                  | 0.95***      | -50.51***     |
| Black                                         | 0.38+                                    | 0.63*        | -357.43*      | 1.18                                     | 0.69*        | -144.3        |
| <b><u>Income (Ref: &lt;\$19,999)</u></b>      |                                          |              |               |                                          |              |               |
| 20,000-29,999                                 | 0.48                                     | 1.28         | 286.39++      | 1.36                                     | 1.66*        | 561.05**      |
| 30,000-39,999                                 | 1.93+                                    | 2.08**       | 510.49**      | 1.36                                     | 2.18**       | 847.30***     |
| 40,000-59,999                                 | 1.4                                      | 2.00**       | 889.48***     | 1.48                                     | 1.82*        | 817.07***     |
| 60,000+                                       | 3.06**                                   | 3.53***      | 1,214.12***   | 1.51                                     | 2.69***      | 1,135.37***   |
| <b><u>Education (Ref: &lt;=11 yrs)</u></b>    |                                          |              |               |                                          |              |               |
| 12-15 years                                   | 3.47*                                    | 1.78***      | 652.90***     | 7.27**                                   | 1.78**       | 438.08*       |
| 16 years or more                              | 4.67**                                   | 3.17***      | 1,159.66***   | 9.81**                                   | 2.03*        | 768.05***     |
| <b><u>Health Behaviors</u></b>                |                                          |              |               |                                          |              |               |
| Physical Activity                             | 1.15                                     | 1.29***      | 410.49***     | 1.24++                                   | 1.38***      | 364.20***     |
| <b><u>Smoking (Ref: Never smoked)</u></b>     |                                          |              |               |                                          |              |               |
| Former smoker                                 | 0.93                                     | 0.91         | -284.05*      | 1.15                                     | 1.03         | -66.68        |
| Current smoker                                | 0.47++                                   | 0.64+        | -620.24***    | 1.03                                     | 0.72         | -444.63*      |
| <b><u>Monthly Alcohol Use (Ref: None)</u></b> |                                          |              |               |                                          |              |               |
| 1-60                                          | 1.57++                                   | 1.38*        | 245.82+       | 0                                        | 0            | 0             |
| 61+                                           | 2.47++                                   | 1.64         | 37.75         | 0                                        | 0            | 0             |
| <b><u>BMI (Ref: Normal)</u></b>               |                                          |              |               |                                          |              |               |
| Overweight                                    | 0.83                                     | 0.84         | -156.29       | 0.66++                                   | 0.83         | -29.18        |
| Obese                                         | 0.59                                     | 0.65*        | -422.98**     | 0.32**                                   | 0.77         | -151.76       |
| <b><u>Psychosocial Risks</u></b>              |                                          |              |               |                                          |              |               |
| Chronic Stress                                | 1.01                                     | 1            | 22.1          | 1.14                                     | 1.05         | 35.52         |
| Total Life Events                             | 0.95                                     | 0.96++       | -55.07*       | 0.87*                                    | 0.95*        | -66.80**      |
| Mastery                                       | 1.23                                     | 1.21**       | 226.31***     | 1.13                                     | 1.20*        | 235.13***     |
| Support                                       | 0.91                                     | 0.99         | 65.31         | 1.04                                     | 1.03         | 138.73*       |
| R-squared                                     |                                          |              | 0.43          |                                          |              | 0.43          |

++p&lt;.20; +p&lt;.10; \*p&lt;.05; \*\*p&lt;.01; \*\*\*p&lt;.001

All independent variables are measured in the same year as the outcome measure.

Appendix Table 3) Predicting Three Different Measures of Successful Aging in 2010

| VARIABLES                                     | 2010 Respondents Over 50 (n=1060) |              |               |
|-----------------------------------------------|-----------------------------------|--------------|---------------|
|                                               | Binary (OR)                       | Ordinal (OR) | Sq Continuous |
| <b><u>Demographics</u></b>                    |                                   |              |               |
| Female                                        | 1                                 | 0.84         | -173.39++     |
| Age                                           | 0.92***                           | 0.93***      | -51.66***     |
| Black                                         | 0.69                              | 0.67*        | -307.81*      |
| <b><u>Income (Ref: &lt;\$19,999)</u></b>      |                                   |              |               |
| 20,000-29,999                                 | 3.46+                             | 1.59++       | 516.57*       |
| 30,000-39,999                                 | 1.13                              | 1.80*        | 593.60**      |
| 40,000-59,999                                 | 1.86                              | 1.66+        | 545.86**      |
| 60,000+                                       | 3.66+                             | 3.35***      | 1,158.68***   |
| <b><u>Education (Ref: &lt;=11 yrs)</u></b>    |                                   |              |               |
| 12-15 years                                   | 5.14*                             | 2.07**       | 653.05***     |
| 16 years or more                              | 10.06**                           | 4.13***      | 1,180.28***   |
| <b><u>Health Behaviors</u></b>                |                                   |              |               |
| Physical Activity                             | 1.37*                             | 1.21*        | 348.74***     |
| <b><u>Smoking (Ref: Never smoked)</u></b>     |                                   |              |               |
| Former smoker                                 | 0.98                              | 0.93         | -178.48++     |
| Current smoker                                | 0.39+                             | 0.47***      | -431.89*      |
| <b><u>Monthly Alcohol Use (Ref: None)</u></b> |                                   |              |               |
| 1-60                                          | 0                                 | 0            | 0             |
| 61+                                           | 0                                 | 0            | 0             |
| <b><u>BMI (Ref: Normal)</u></b>               |                                   |              |               |
| Overweight                                    | 1.28                              | 0.78++       | -201.41++     |
| Obese                                         | 0.81                              | 0.66*        | -369.12*      |
| <b><u>Psychosocial Risks</u></b>              |                                   |              |               |
| Chronic Stress                                | 0.85                              | 0.85+        | -76.68        |
| Total Life Events                             | 0.93+                             | 0.99         | -45.03**      |
| Mastery                                       | 1.26++                            | 1.14++       | 208.59**      |
| Support                                       | 0.82++                            | 0.96         | -7.06         |
| R-squared                                     |                                   |              | 0.43          |

++p<.20; +p<.10; \*p<.05; \*\*p<.01; \*\*\*p<.001

All independent variables are measured in the same year as the outcome measure.

Appendix Table 4) Summary of Trends in Statistical Significance Across Waves and Measures

|                                        | Total Number<br>of Times<br>Significant | Continuous | Binary | Ordinal |
|----------------------------------------|-----------------------------------------|------------|--------|---------|
| <b><u>Demographics</u></b>             |                                         |            |        |         |
| Female                                 | 3                                       | 0          | 2      | 1       |
| Age                                    | 15                                      | 5          | 5      | 5       |
| Black                                  | 6                                       | 2          | 0      | 4       |
| <i>Income (Ref: &lt;\$19,999)</i>      |                                         |            |        |         |
| 20,000-29,999                          | 10                                      | 4          | 1      | 5       |
| 30,000-39,999                          | 10                                      | 5          | 1      | 4       |
| 40,000-59,999                          | 12                                      | 5          | 2      | 5       |
| 60k+                                   | 15                                      | 5          | 5      | 5       |
| <i>Education (Ref: &lt;=11 yrs)</i>    |                                         |            |        |         |
| 12-15 years                            | 15                                      | 5          | 5      | 5       |
| 16 years or more                       | 15                                      | 5          | 5      | 5       |
| <b>Health Behaviors</b>                |                                         |            |        |         |
| Physical Activity                      | 11                                      | 5          | 1      | 5       |
| <i>Smoking (Ref: Never smoked)</i>     |                                         |            |        |         |
| Former smoker                          | 2                                       | 1          | 0      | 1       |
| Current smoker                         | 5                                       | 4          | 0      | 1       |
| <i>Monthly Alcohol Use (Ref: None)</i> |                                         |            |        |         |
| 0-60                                   | 5                                       | 2          | 0      | 3       |
| 61+                                    | 0                                       | 0          | 0      | 0       |
| <i>BMI (Ref: Normal)</i>               |                                         |            |        |         |
| Overweight                             | 1                                       | 0          | 0      | 1       |
| Obese                                  | 5                                       | 2          | 1      | 2       |
| <b>Psychosocial Risks</b>              |                                         |            |        |         |
| Chronic Stress                         | 0                                       | 0          | 0      | 0       |
| Total Life Events                      | 9                                       | 5          | 2      | 2       |
| Mastery                                | 9                                       | 5          | 1      | 3       |
| Support                                | 2                                       | 2          | 0      | 0       |

Appendix Figure 1) Comparison of Estimated Effects and 95% Confidence Intervals from Three Models

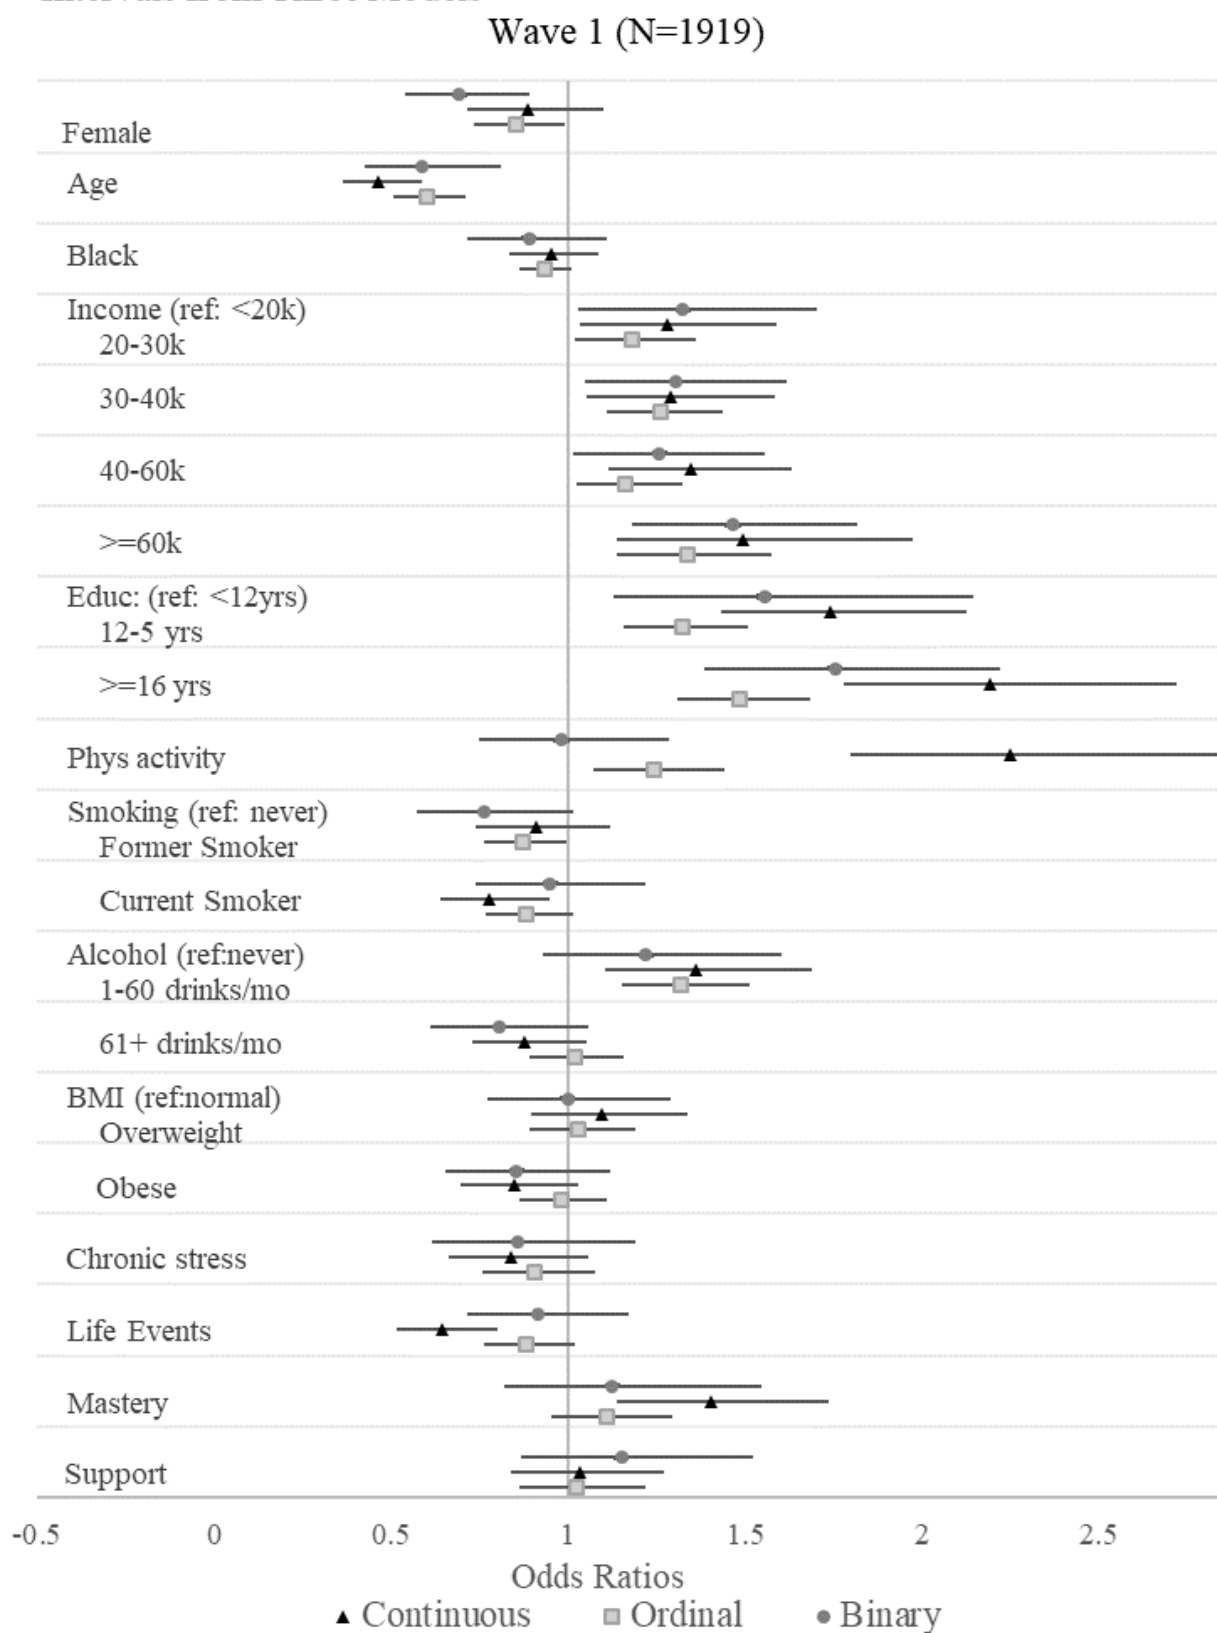

Appendix Figure 2) Comparison of Estimated Effects and 95% Confidence Intervals from Three Models  
Wave 2 (N=1595)

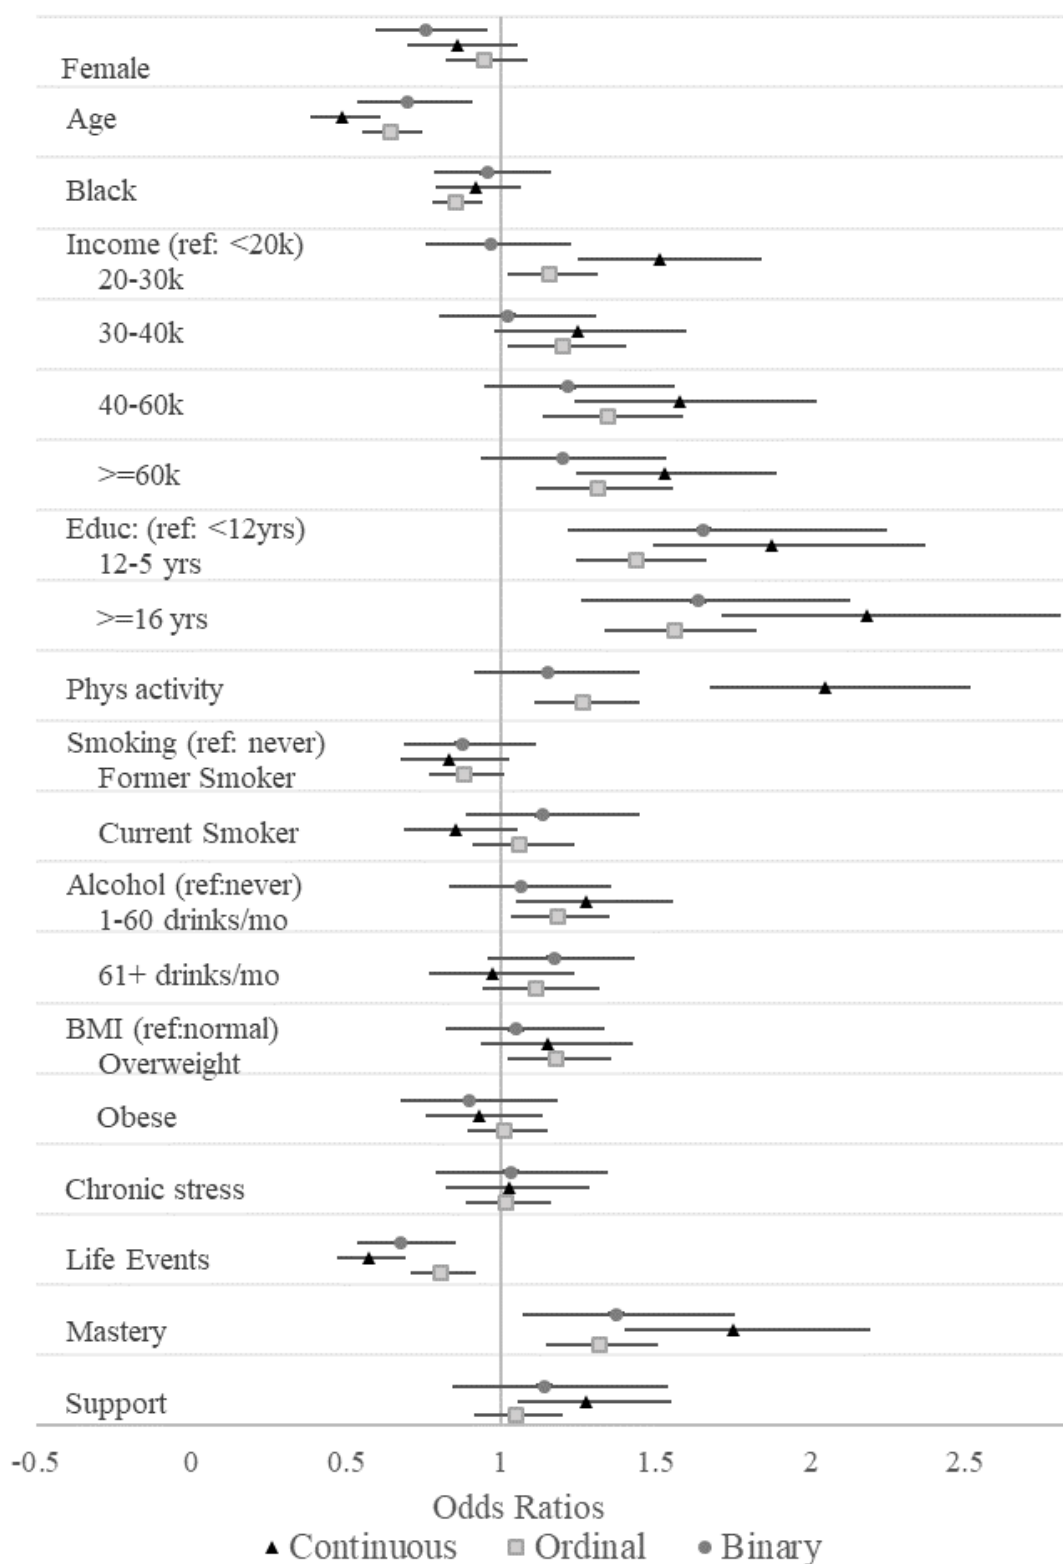

Appendix Figure 3) Comparison of Estimated Effects and 95% Confidence Intervals from Three Models  
Wave 3 (N=1285)

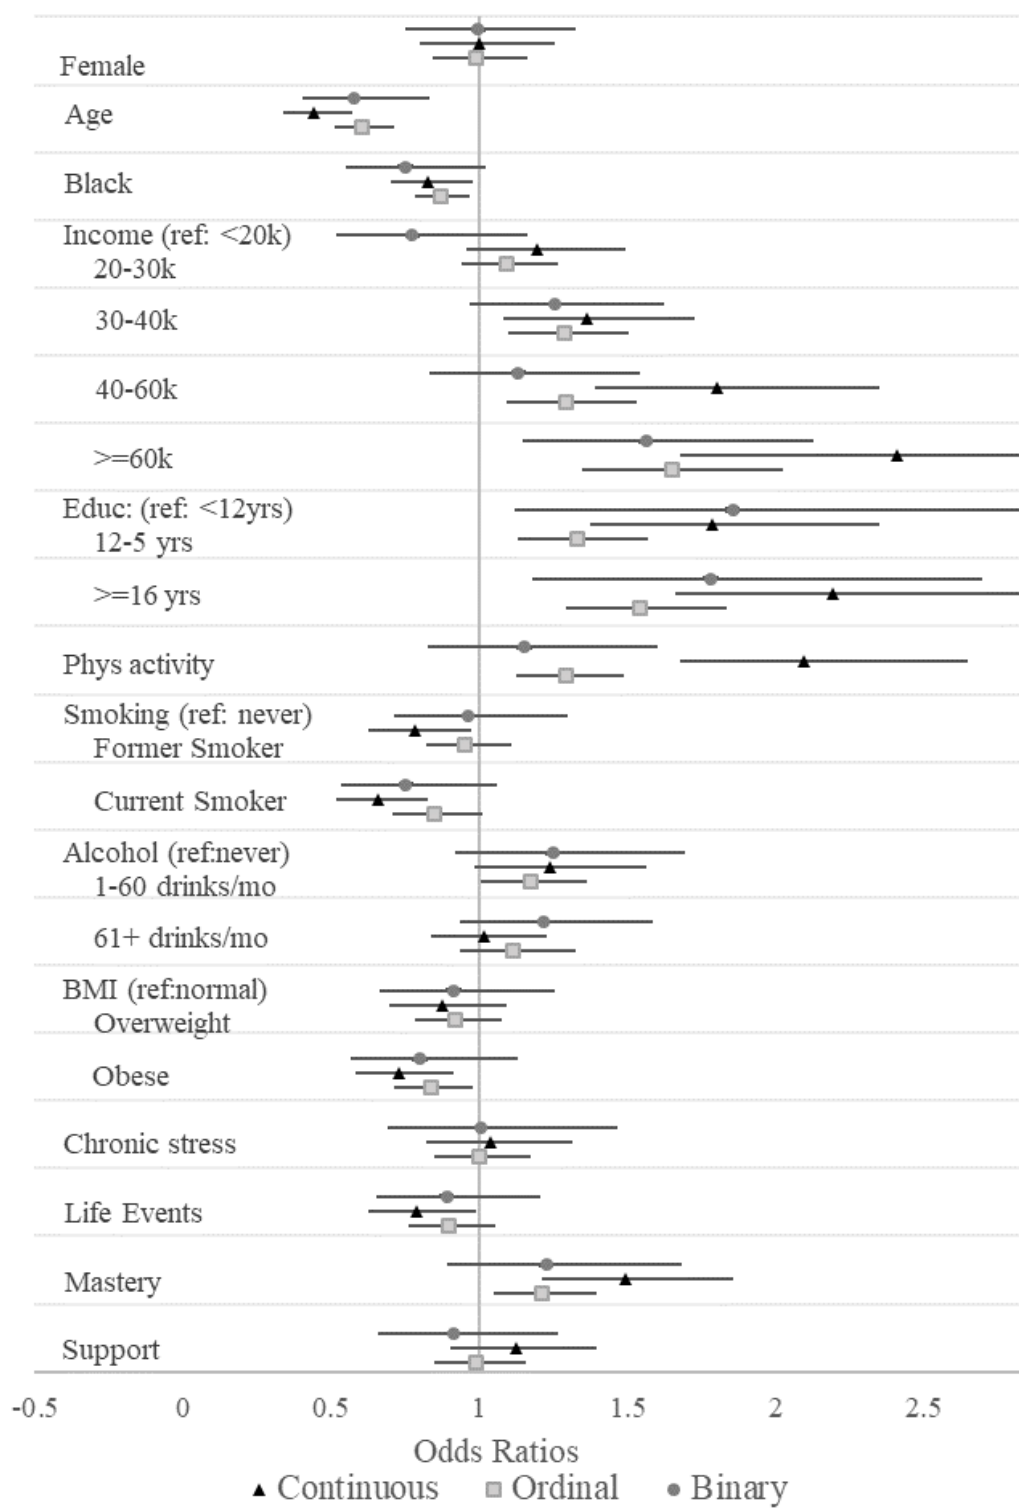

Appendix Figure 4) Comparison of Estimated Effects and 95% Confidence Intervals from Three Models  
Wave 4 (N=1089)

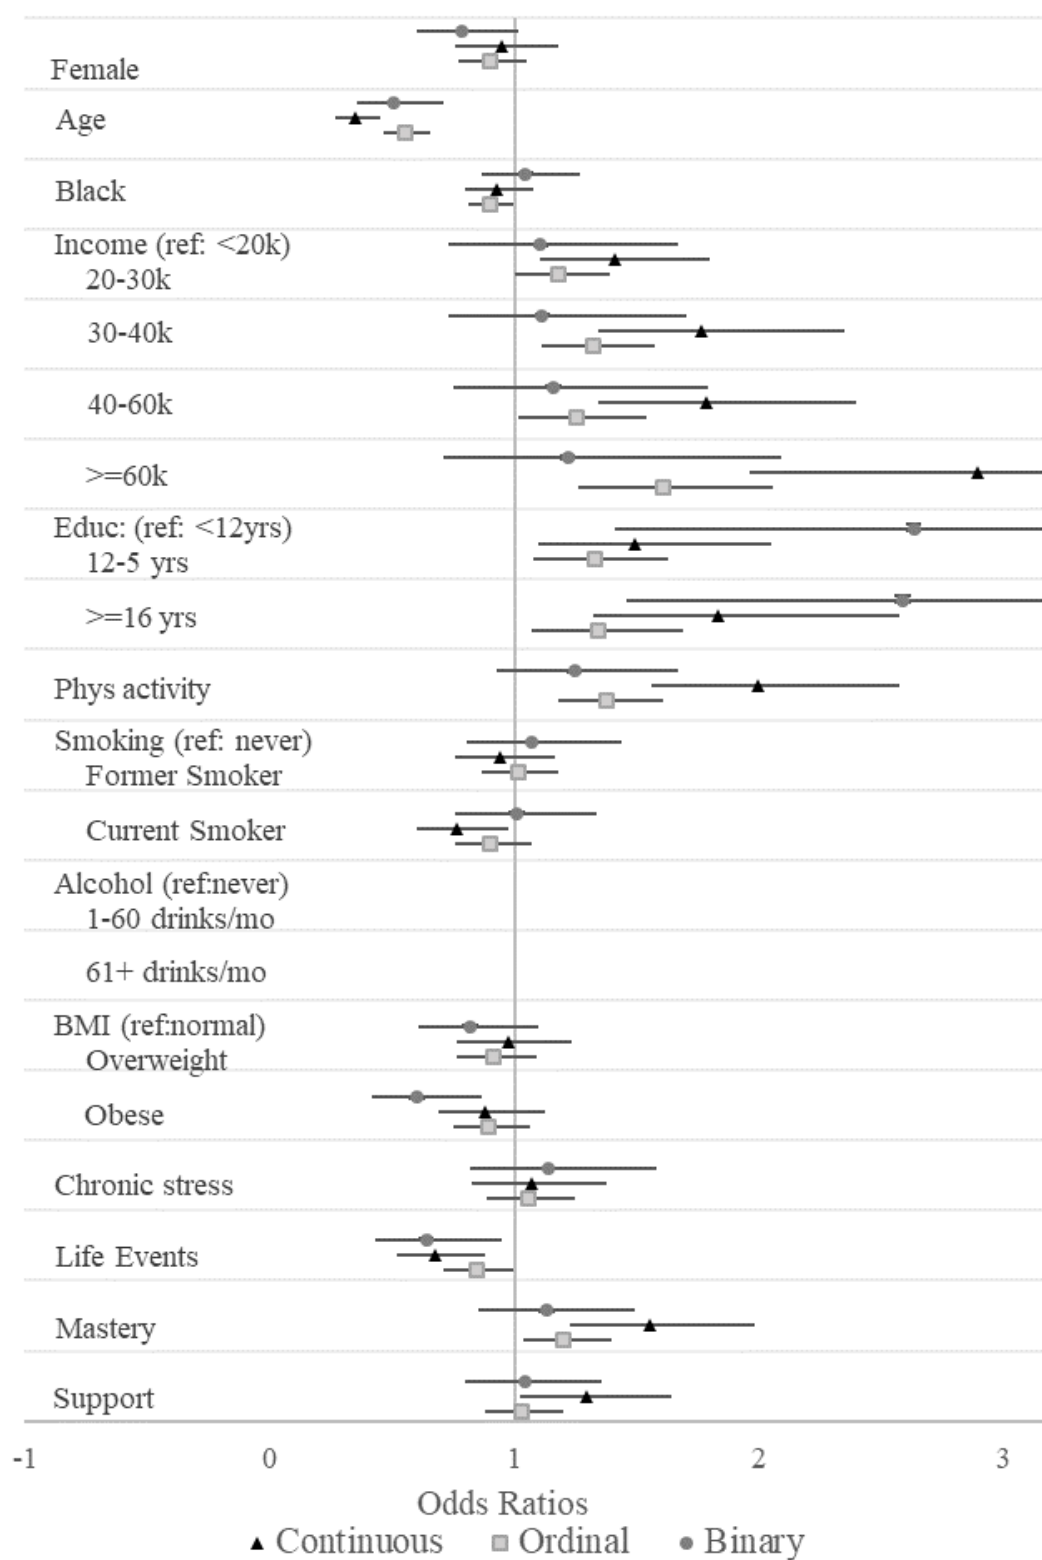



Appendix Figure 5) Comparison of Estimated Effects and 95% Confidence Intervals from Three Models  
Wave 5 (N=1060)

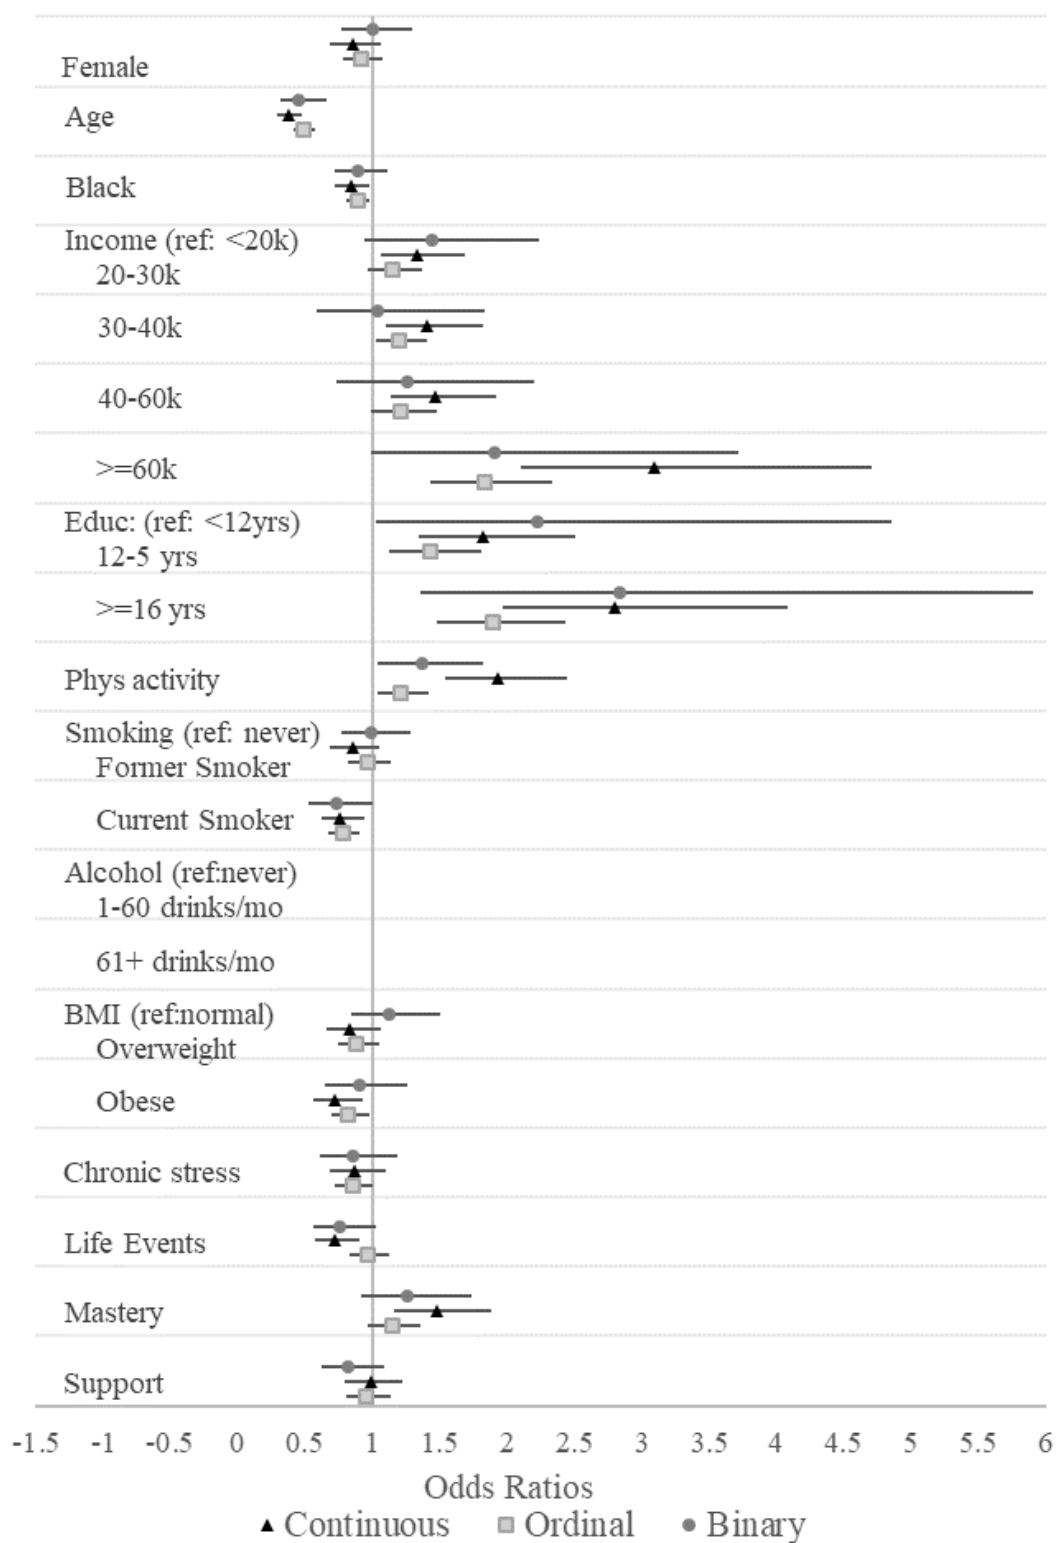

Supplement: Supplementary file 1 [file 14005346]
